# Supplementary material for: Transitions in high-Arctic vegetation growth patterns and ecosystem productivity tracked with automated cameras from 2000 to 2013
Source: Springer Nature journal article supplement (doi:10.1007/s13280-016-0864-8), 2017-01-23
Supplement: MOESM1 [file 15654738]

**Ambio**

Electronic Supplementary Materials

*This supplementary material has not been peer reviewed.*

**Title: Transitions in high-Arctic vegetation growth patterns and ecosystem productivity tracked with automated cameras from 2000-2013**

Authors: Andreas Westergaard-Nielsen, Magnus Lund, Stine Højlund Pedersen, Niels Martin Schmidt, Stephen Klosterman, Jakob Abermann, Birger Ulf Hansen

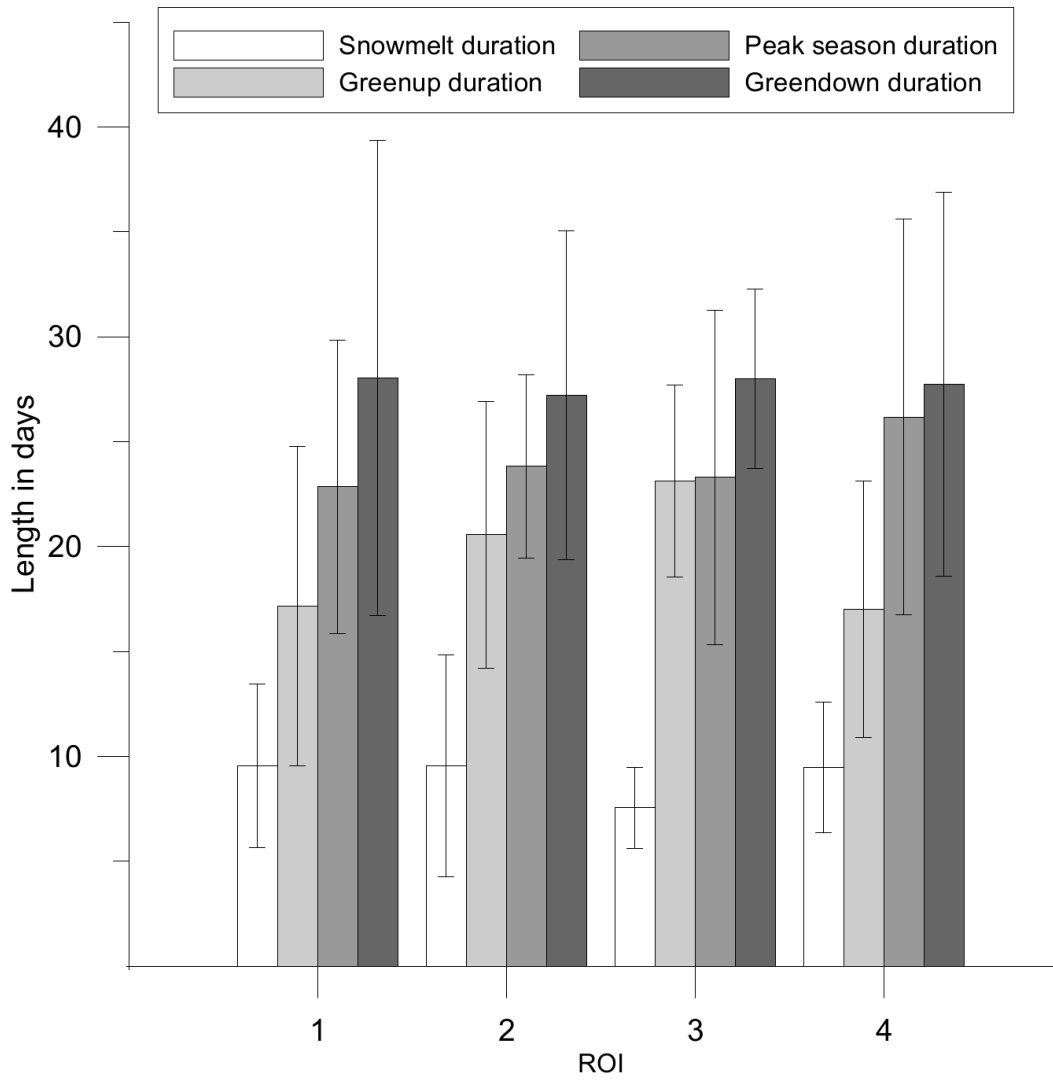

Figure S1: Average durations of snowmelt and phenological transitions. Standard deviations are highest for greenup and greendown durations. ROI refers to region of interest.

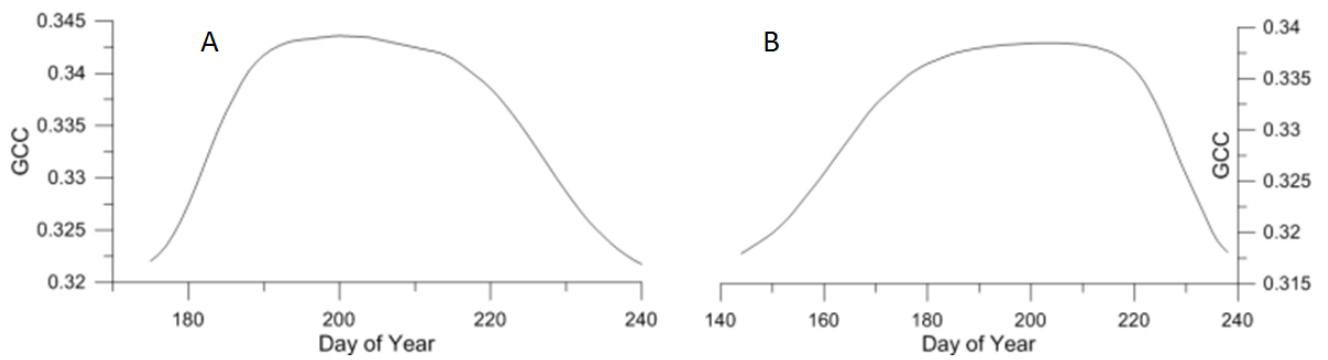

Figure S2: Temporal GCC for (a) snowrich year 2002 and (b) 2009 with limited snowfall, for region 1. Resulting from late end of snowmelt is a fast start of spring rate and slow end of fall rate, while limited snow results in an opposite pattern. The growing season duration is 9 days longer in 2009 based on computed transition dates.

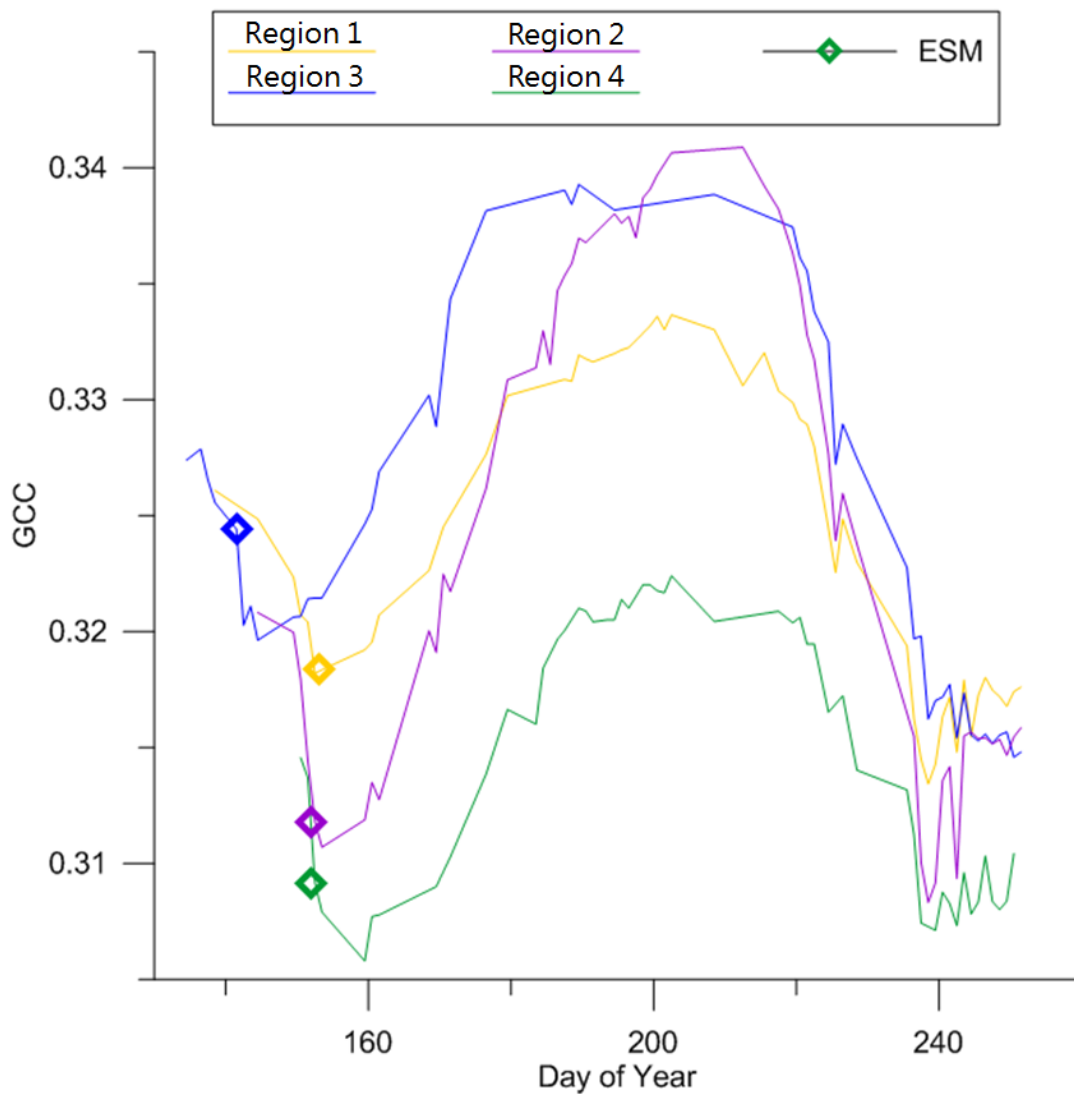

Figure S3: Green Chromatic Coordinate (GCC) for ROI 1-4 in 2009 without a smoothing model fitted. We observed a local minimum following snowmelt. End of snowmelt (ESM) is depicted as symbols in the respective regions.

Table S1: Camera types and matching properties. Due to the oblique angle, the spatial resolution decreases with increasing distance between sensor and object. All images were recorded with auto-settings for white balance, shutter speed, and exposure, as no manual control was possible.

| <b>Time period</b> | <b>Camertype</b> | <b>Resolution in pixels and space</b> |
|--------------------|------------------|---------------------------------------|
| <b>2000-2005</b>   | 1) Kodak DC50    | 756x504; 1.8-16 m                     |
| <b>2005-2007</b>   | 2) Kodak CX6200  | 1632x1232; 0.8-3.7 m                  |
| <b>2008-2013</b>   | 3) HP E427       | 2848x2136; 0.4-1.9 m                  |

Table S2: Generalized linear model analysis with GPP as response and GCC, Camera model, and the interaction GPP\*Camera model as predictors. Low mean square results from the high number of degrees of freedom.

| Total R <sup>2</sup> = 0.84, RMSE = 0.0036 |                 |                |
|--------------------------------------------|-----------------|----------------|
| <b>Correlated variable(s)</b>              | <b>Mean sq.</b> | <b>p-value</b> |
| GPP                                        | 0.00351         | <0.001         |
| Cameratype                                 | 0.00076         | <0.001         |
| GPP*Cameratype                             | 0.00027         | <0.001         |

Table S3: Dataset with computed transition dates

| Year | Region | Start of snowmelt | End of snowmelt | Start of spring | Middle of spring | End of spring | Peak of season | Start of fall | Middle of fall | End of fall |
|------|--------|-------------------|-----------------|-----------------|------------------|---------------|----------------|---------------|----------------|-------------|
| 2000 | 1      | 140.0             | 147.0           | 168.7           | 178.2            | 186.9         | 198.5          | 213.8         | 227.5          | 241.0       |
| 2001 | 1      | 151.0             | 164.0           | 165.7           | 178.5            | 191.6         | 209.5          | 219.6         | 235.2          | 251.3       |
| 2002 | 1      | 147.5             | 160.0           | 173.5           | 182.1            | 190.6         | 199.5          | 212.6         | 230.8          | 248.3       |
| 2003 | 1      | 144.0             | 157.0           | 172.5           | 182.2            | 191.7         | 199.5          | 204.4         | 227.5          | 250.1       |
| 2004 | 1      | 148.5             | 155.0           | 163.0           | 175.3            | 187.0         | 206.5          | 222.1         | 235.6          | 249.3       |
| 2005 | 1      | NaN               | NaN             | NaN             | NaN              | NaN           | NaN            | NaN           | NaN            | NaN         |
| 2006 | 1      | 164.5             | 172.0           | 183.6           | 186.7            | 189.8         | 212.5          | 220.0         | 239.4          | 258.9       |
| 2007 | 1      | 134.0             | 153.0           | 162.4           | 171.9            | 181.1         | 195.5          | 206.7         | 227.0          | 246.7       |
| 2008 | 1      | 154.0             | 161.5           | 163.0           | 179.8            | 196.5         | 210.5          | 220.7         | 232.6          | 244.5       |
| 2009 | 1      | 136.0             | 141.5           | 154.6           | 165.7            | 176.8         | 202.5          | 218.1         | 228.6          | 238.8       |
| 2010 | 1      | 153.0             | 161.0           | 168.3           | 177.6            | 187.0         | 198.5          | 214.4         | 229.2          | 244.1       |
| 2011 | 1      | 147.5             | 158.0           | 163.5           | 174.9            | 186.5         | 202.5          | 214.0         | 230.6          | 247.3       |
| 2012 | 1      | 163.5             | 169.0           | 180.1           | 189.3            | 198.7         | 210.5          | 222.5         | 234.9          | 247.4       |
| 2013 | 1      | 135.0             | 143.5           | 160.6           | 174.5            | 188.2         | 195.5          | 208.1         | 219.0          | 229.9       |
| 2000 | 2      | 162.5             | 172.5           | 177.8           | 182.6            | 187.3         | 200.5          | 213.0         | 230.2          | 248.3       |
| 2001 | 2      | 156.0             | 177.5           | 184.0           | 188.9            | 194.6         | 208.5          | 222.5         | 233.3          | 244.0       |
| 2002 | 2      | 160.0             | 179.0           | 179.3           | 185.6            | 192.2         | 203.5          | 219.3         | 238.8          | 258.4       |
| 2003 | 2      | 158.5             | 166.5           | 173.8           | 181.1            | 188.3         | 194.5          | 207.6         | 232.4          | 257.3       |
| 2004 | 2      | 160.0             | 168.0           | 178.4           | 185.6            | 193.1         | 200.5          | 221.6         | 233.8          | 245.3       |
| 2005 | 2      | NaN               | NaN             | NaN             | NaN              | NaN           | NaN            | NaN           | NaN            | NaN         |
| 2006 | 2      | 173.5             | 185.5           | 179.1           | 185.4            | 191.3         | 213.5          | 220.6         | 243.3          | 265.9       |
| 2007 | 2      | 158.5             | 164.0           | 169.9           | 180.7            | 191.2         | 202.5          | 205.9         | 224.0          | 241.6       |
| 2008 | 2      | 167.0             | 178.0           | 183.9           | 190.6            | 197.5         | 206.5          | 217.7         | 232.4          | 247.0       |
| 2009 | 2      | 145.0             | 152.0           | 163.0           | 178.2            | 193.3         | 209.5          | 216.2         | 226.4          | 236.7       |
| 2010 | 2      | 162.5             | 167.5           | 170.9           | 180.5            | 189.8         | 199.5          | 216.3         | 227.0          | 238.2       |
| 2011 | 2      | 162.0             | 168.0           | 170.7           | 182.5            | 194.7         | 203.5          | 213.2         | 225.1          | 237.0       |
| 2012 | 2      | 172.5             | 178.0           | 187.1           | 193.6            | 200.1         | 206.5          | 218.1         | 232.0          | 246.0       |
| 2013 | 2      | 146.0             | 151.5           | 162.8           | 177.0            | 192.6         | 197.5          | 203.2         | 222.9          | 242.4       |
| 2000 | 3      | 158.0             | 167.0           | 174.9           | 180.6            | 186.8         | 206.5          | 217.0         | 227.4          | 237.7       |
| 2001 | 3      | 165.0             | 172.5           | 183.2           | 187.8            | 192.5         | 202.0          | 220.7         | 234.9          | 248.6       |
| 2002 | 3      | 160.5             | 167.0           | 175.2           | 182.8            | 190.4         | 208.0          | 213.1         | 230.0          | 246.5       |
| 2003 | 3      | 162.0             | 168.0           | 166.3           | 177.3            | 188.1         | 198.5          | 208.8         | 230.3          | 251.8       |
| 2004 | 3      | 157.5             | 165.0           | 177.9           | 186.2            | 194.7         | 206.5          | 218.7         | 232.5          | 246.4       |
| 2005 | 3      | NaN               | NaN             | NaN             | NaN              | NaN           | NaN            | NaN           | NaN            | NaN         |
| 2006 | 3      | 168.0             | 176.5           | 186.6           | 188.1            | 189.5         | 214.5          | 229.7         | 246.9          | 264.1       |
| 2007 | 3      | 154.5             | 163.0           | 166.6           | 178.9            | 190.9         | 202.5          | 214.2         | 231.9          | 249.6       |
| 2008 | 3      | 163.0             | 169.0           | 176.4           | 186.9            | 197.3         | 209.0          | 221.0         | 232.0          | 243.0       |
| 2009 | 3      | 142.5             | 153.0           | 159.8           | 171.8            | 183.6         | 205.9          | 215.8         | 226.9          | 237.5       |
| 2010 | 3      | 160.5             | 167.0           | 169.5           | 181.0            | 192.2         | 200.5          | 210.5         | 226.5          | 242.3       |

|      |   |       |       |       |       |       |       |       |       |       |
|------|---|-------|-------|-------|-------|-------|-------|-------|-------|-------|
| 2011 | 3 | 161.5 | 165.5 | 166.5 | 181.7 | 196.8 | 206.5 | 218.5 | 225.9 | 232.7 |
| 2012 | 3 | 172.0 | 178.5 | 188.3 | 192.9 | 197.7 | 211.5 | 224.1 | 233.9 | 243.7 |
| 2013 | 3 | 141.0 | 152.0 | 153.6 | 167.3 | 180.8 | 193.5 | 208.3 | 217.5 | 226.5 |
| 2000 | 4 | 160.5 | 171.5 | 179.0 | 182.6 | 186.0 | 198.5 | 219.6 | 230.0 | 240.0 |
| 2001 | 4 | 165.0 | 177.5 | 189.9 | 192.5 | 195.4 | 215.5 | 225.8 | 237.4 | 248.4 |
| 2002 | 4 | 165.5 | 179.0 | 183.3 | 189.4 | 195.8 | 203.5 | 212.1 | 233.0 | 255.4 |
| 2003 | 4 | 163.0 | 170.5 | 172.0 | 179.5 | 187.2 | 194.5 | 214.3 | 234.6 | 254.8 |
| 2004 | 4 | 158.5 | 169.5 | 174.6 | 183.4 | 192.1 | 200.5 | 234.1 | 237.3 | 240.4 |
| 2005 | 4 | NaN   | NaN   | NaN   | NaN   | NaN   | NaN   | NaN   | NaN   | NaN   |
| 2006 | 4 | 176.5 | 185.5 | 189.3 | NaN   | NaN   | 219.5 | 212.4 | 237.8 | 263.1 |
| 2007 | 4 | 158.0 | 165.0 | 172.2 | 184.6 | 196.1 | 202.5 | 220.2 | 231.3 | 242.8 |
| 2008 | 4 | 171.0 | 178.5 | 186.2 | 190.0 | 194.0 | 205.5 | 216.6 | 231.9 | 246.8 |
| 2009 | 4 | 142.0 | 152.0 | 161.5 | 175.2 | 188.9 | 205.5 | 220.0 | 228.8 | 237.3 |
| 2010 | 4 | 163.0 | 169.0 | 176.8 | 184.6 | 192.1 | 203.5 | 217.2 | 229.8 | 242.5 |
| 2011 | 4 | 158.0 | 165.5 | 167.5 | 177.8 | 188.4 | 205.5 | 216.3 | 227.8 | 239.0 |
| 2012 | 4 | 176.0 | 181.0 | 187.9 | 193.8 | 200.0 | 210.5 | 225.5 | 236.7 | 247.8 |
| 2013 | 4 | 136.0 | 151.5 | 155.6 | 168.9 | 182.0 | 192.5 | 207.3 | 222.0 | 236.4 |
